# Supplementary material
Source: PubMed Central journal article supplement (PMC8645194)
Supplement: icab006_supplementary_data.pdf [file icab006_supplementary_data.pdf]

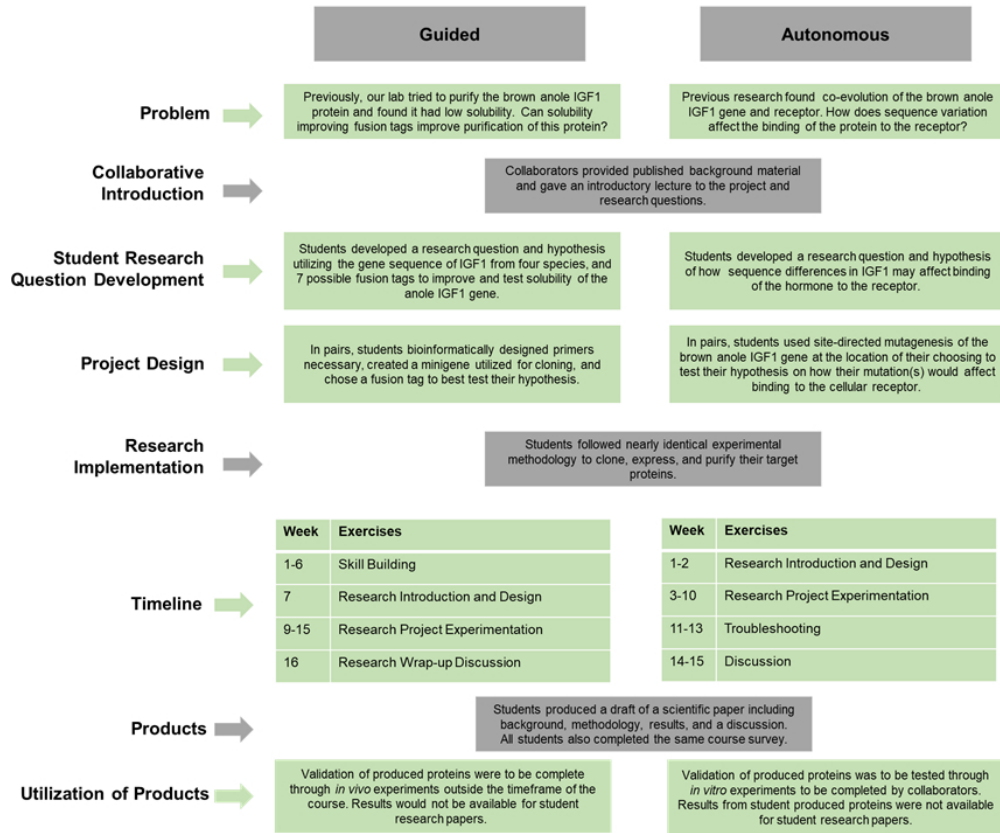

Supplemental Figure 1: Detailed Research Design. The presented problem, student goals, project implementation and timelines are displayed in both the Guided and Autonomous Formats. Green boxes highlight differences between the two laboratory learning experiences, while gray boxes show similarities.

226x190mm (96 x 96 DPI)
